# Supplementary material for: Adaptation and psychometric evaluation of the Brief Social Support Scale for Families (BS6-F)
Source: Research Square preprint supplement (doi:10.21203/rs.3.rs-8029850/v1), 2025-12-08
Supplement: Supplementary file 1 [file 72a4ce060731e65af8fafa99.docx]

**Additional file 1. Brief Social Support Scale for Families (BS6-F).**

| English | German |
| --- | --- |
| If you needed it, how often is someone available… | Wie häufig steht Ihnen folgende Unterstützung durch andere Menschen zur Verfügung? |
| *Tangible support* | |
| To take your child to appointments or to pick them up from daycare/school if you’re not available | Jemand, der Ihr Kind zu Terminen bringen oder aus der Betreuung abholen kann, wenn Sie verhindert sind |
| To support you in child care duties | Jemand, der Sie bei der Kinderbetreuung unterstützt |
| To help with daily chores (e.g. shopping, household duties) | Jemand, der Ihnen bei alltäglichen Arbeiten (z.B. Besorgungen oder im Haushalt) hilft |
| *Emotional-informational support* | |
| To give you good advice about a crisis | Jemand, der Ihnen in schwierigen Situationen gute Ratschläge gibt |
| To confide in or talk to about yourself or your problems | Jemand, dem Sie sich anvertrauen oder mit dem Sie über persönliche Probleme sprechen können |
| Who understands your problems | Jemand, der Ihre Probleme versteht |
| *Rating options: 1= never, 2=occasionally, 3= mostly, 4 = always* | *Antwortoptionen: 1= nie, 2=manchmal, 3= meist, 4 = immer* |
